# Supplementary material
Source: PubMed Central journal article supplement (PMC6647001)
Supplement: jamadermatol-155-1175-s001.pdf [file jamadermatol-155-1175-s001.pdf]

## Supplementary Online Content

Tkachenko E, Singer S, Sharma P, Barbieri J, Mostaghimi A. US Food and Drug Administration reports of pregnancy and pregnancy-related adverse events associated with isotretinoin. *JAMA Dermatol*. Published online July 17, 2019. doi:10.1001/jamadermatol.2019.1388

**eTable.** Reaction Term Grouping Strategy for Pregnancy and Pregnancy-Related Outcomes

This supplementary material has been provided by the authors to give readers additional information about their work.

**eTable.** Reaction Term Grouping Strategy for Pregnancy and Pregnancy-Related Outcomes

|                                                         |
|---------------------------------------------------------|
| Pregnancy                                               |
| COMPLICATIONS OF MATERNAL EXPOSURE TO THERAPEUTIC DRUGS |
| DELIVERY                                                |
| DRUG EXPOSURE BEFORE PREGNANCY                          |
| DRUG EXPOSURE DURING PREGNANCY                          |
| DRUG EXPOSURE BEFORE PREGNANCY                          |
| DRUG EXPOSURE DURING PREGNANCY                          |
| EXPOSURE DURING PREGNANCY                               |
| FOETAL EXPOSURE DURING PREGNANCY                        |
| FOETAL EXPOSURE TIMING UNSPECIFIED                      |
| LIVE BIRTH                                              |
| MATERNAL DRUGS AFFECTING FOETUS                         |
| MATERNAL EXPOSURE BEFORE PREGNANCY                      |
| MATERNAL EXPOSURE DURING DELIVERY                       |
| MATERNAL EXPOSURE TIMING UNSPECIFIED                    |
| PREGNANCY                                               |
| PREGNANCY AFTER POST COITAL CONTRACEPTION               |
| PREGNANCY NOS                                           |
| PREGNANCY ON CONTRACEPTIVE                              |
| PREGNANCY ON ORAL CONTRACEPTIVE                         |
| PREGNANCY WITH CONTRACEPTIVE DEVICE                     |
| PREGNANCY WITH IMPLANT CONTRACEPTIVE                    |
| UNINTENDED PREGNANCY                                    |
| UNWANTED PREGNANCY                                      |
| THIRD TRIMESTER PREGNANCY                               |
| TWIN PREGNANCY                                          |
| BENIGN HYDATIDIFORM MOLE                                |
| COMPLICATION OF DELIVERY                                |
| COMPLICATION OF PREGNANCY                               |
| DELAYED DELIVERY                                        |
| ECLAMPSIA                                               |
| ECTOPIC PREGNANCY                                       |
| FAILED FORCEPS DELIVERY                                 |
| FAILED INDUCTION OF LABOUR                              |
| FALSE LABOUR                                            |
| GESTATIONAL HYPERTENSION                                |
| HAEMORRHAGE IN PREGNANCY                                |
| HIGH RISK PREGNANCY                                     |
| INTRAUTERINE INFECTION                                  |
| LABOUR COMPLICATION                                     |
| MECONIUM ABNORMAL                                       |
| MECONIUM IN AMNIOTIC FLUID                              |
| MECONIUM INCREASED                                      |
| MECONIUM STAIN                                          |
| OLIGOHYDRAMNIOS                                         |
| PLACENTA PRAEVIA                                        |
| PLACENTAL DISORDER                                      |
| PLACENTAL DISORDER NOS                                  |
| POLYHYDRAMNIOS                                          |
| POST-PARTUM HAEMORRHAGE                                 |
| POSTMATURE BABY                                         |
| POSTPARTUM HAEMORRHAGE                                  |
| PRE-ECLAMPSIA                                           |
| PREMATURE BABY                                          |
| PREMATURE LABOUR                                        |
| PREMATURE RUPTURE OF MEMBRANES                          |
| PREMATURE SEPARATION OF PLACENTA                        |
| RETAINED PLACENTA OR MEMBRANES                          |
| SHOULDER DYSTOCIA                                       |
| VOMITING IN PREGNANCY                                   |
| THREATENED LABOUR                                       |
| UMBILICAL CORD ABNORMALITY                              |

|                                       |
|---------------------------------------|
| UMBILICAL CORD AROUND NECK            |
| UMBILICAL CORD COMPRESSION            |
| UMBILICAL CORD PROLAPSE               |
| UMBILICAL SEPSIS NOS                  |
| UTERINE CONTRACTIONS                  |
| UTERINE CONTRACTIONS DURING PREGNANCY |
| PREGNANCY INDUCED HYPERTENSION        |
| ANEMBRYONIC GESTATION                 |
| ABNORMAL LABOUR                       |
| ANTEPARTUM HAEMORRHAGE                |
| AMNIOTIC CAVITY DISORDER              |
| ARRESTED LABOUR                       |
| BREECH DELIVERY                       |
| BREECH PRESENTATION                   |
| CEPHALO-PELVIC DISPROPORTION          |
| CERVIX DYSTOCIA                       |
| CHORIOAMNIONITIS                      |
| COMPLICATIONS OF PREGNANCY NOS        |
| FOETAL MALPOSITION NOS                |
| HYDATIDIFORM MOLE NOS                 |
| HYPEREMESIS GRAVIDARUM                |
| INDUCED LABOUR                        |
| TRANSVERSE PRESENTATION               |
| CHORIOAMNIONITIS                      |
| ABORTION                              |
| ABORTION COMPLETE                     |
| ABORTION INCOMPLETE                   |
| ABORTION INCOMPLETE NOS               |
| ABORTION INFECTED                     |
| ABORTION MISSED                       |
| ABORTION NOS                          |
| ABORTION SPONTANEOUS                  |
| ABORTION SPONTANEOUS NOS              |
| ABORTION THREATENED                   |
| ABNORMAL PRODUCT OF CONCEPTION NOS    |
| ABORTION INDUCED                      |
| ARRHYTHMIA NOS FOETAL                 |
| ARRHYTHMIA NOS NEONATAL               |
| BRADYCARDIA FOETAL                    |
| CONVULSION NEONATAL                   |
| DEATH NEONATAL                        |
| DISORDER FOETAL NOS                   |
| DISORDER NEONATAL NOS                 |
| FEVER NEONATAL                        |
| FOETAL DISORDER                       |
| FOETAL DISORDER NOS                   |
| FOETAL DISTRESS SYNDROME              |
| FOETAL GROWTH RESTRICTION             |
| FOETAL GROWTH RETARDATION             |
| FOETAL HEART RATE DECELERATION        |
| FOETAL MATURATION IMPAIRED            |
| FOETAL MOVEMENTS DECREASED            |
| FONTANELLE BULGING                    |
| HYPERTONIA NEONATAL                   |
| HYPOTONIA NEONATAL                    |
| INFANTILE APNOEIC ATTACK              |
| NEONATAL ANOXIA                       |
| NEONATAL APNOEIC ATTACK               |
| NEONATAL DISORDER                     |
| NEONATAL DISORDER NOS                 |
| NEONATAL HYPOTENSION                  |
| RASH NEONATAL                         |
| RENAL FAILURE NEONATAL                |
| RENAL IMPAIRMENT NEONATAL             |
| SEPSIS NEONATAL                       |

|                               |
|-------------------------------|
| TACHYCARDIA FOETAL            |
| TREMOR NEONATAL               |
| VISION ABNORMAL NEONATAL      |
| ANEMBRYONIC GESTATION         |
| FAILURE TO THRIVE             |
| LARGE FOR DATES BABY          |
| SMALL FOR DATES BABY          |
| AMNIOTIC CAVITY DISORDER      |
| BLIGHTED OVUM                 |
| POSTPARTUM VAGINAL LACERATION |
| CERVIX DYSTOCIA               |

|                             |
|-----------------------------|
| <b>Therapeutic Abortion</b> |
| ABORTION INDUCED            |

|                                    |
|------------------------------------|
| <b>Spontaneous Abortion</b>        |
| ABORTION                           |
| ABORTION COMPLETE                  |
| ABORTION INCOMPLETE                |
| ABORTION INCOMPLETE NOS            |
| ABORTION INFECTED                  |
| ABORTION MISSED                    |
| ABORTION NOS                       |
| ABORTION SPONTANEOUS               |
| ABORTION SPONTANEOUS NOS           |
| ABORTION THREATENED                |
| ABNORMAL PRODUCT OF CONCEPTION NOS |

|                                |
|--------------------------------|
| <b>Fetal Defect</b>            |
| ARRHYTHMIA NOS FOETAL          |
| ARRHYTHMIA NOS NEONATAL        |
| BRADYCARDIA FOETAL             |
| CONVULSION NEONATAL            |
| DEATH NEONATAL                 |
| DISORDER FOETAL NOS            |
| DISORDER NEONATAL NOS          |
| FEVER NEONATAL                 |
| FOETAL DISORDER                |
| FOETAL DISORDER NOS            |
| FOETAL DISTRESS SYNDROME       |
| FOETAL GROWTH RESTRICTION      |
| FOETAL GROWTH RETARDATION      |
| FOETAL HEART RATE DECELERATION |
| FOETAL MATURATION IMPAIRED     |
| FOETAL MOVEMENTS DECREASED     |
| FONTANELLE BULGING             |
| HYPERTONIA NEONATAL            |
| HYPOTONIA NEONATAL             |
| INFANTILE APNOEIC ATTACK       |
| NEONATAL ANOXIA                |
| NEONATAL APNOEIC ATTACK        |
| NEONATAL DISORDER              |
| NEONATAL DISORDER NOS          |
| NEONATAL HYPOTENSION           |
| RASH NEONATAL                  |
| RENAL FAILURE NEONATAL         |
| RENAL IMPAIRMENT NEONATAL      |
| SEPSIS NEONATAL                |
| TACHYCARDIA FOETAL             |
| TREMOR NEONATAL                |
| VISION ABNORMAL NEONATAL       |
| ANEMBRYONIC GESTATION          |
| FAILURE TO THRIVE              |
| LARGE FOR DATES BABY           |
| SMALL FOR DATES BABY           |

|                                           |
|-------------------------------------------|
| Pregnancy on Contraception                |
| PREGNANCY AFTER POST COITAL CONTRACEPTION |
| PREGNANCY ON CONTRACEPTIVE                |
| PREGNANCY ON ORAL CONTRACEPTIVE           |
| PREGNANCY WITH CONTRACEPTIVE DEVICE       |
| PREGNANCY WITH IMPLANT CONTRACEPTIVE      |

|                                 |
|---------------------------------|
| Omission                        |
| BREAST ABSCESS                  |
| BREAST ENGORGEMENT              |
| LACTATION DISORDER              |
| LACTATION DISORDER NOS          |
| LACTATION PUERPERAL INCREASED   |
| DRUG EXPOSURE VIA BREAST MILK   |
| EXPOSURE VIA FATHER             |
| PATERNAL DRUGS AFFECTING FOETUS |
